# Supplementary material for: Proteobacteria and Firmicutes Secreted Factors Exert Distinct Effects on Pseudomonas aeruginosa Infection under Normoxia or Mild Hypoxia
Source: MDPI journal article supplement (doi:10.3390/metabo12050449), 2022-05-17
Supplement: s1 [file s1]

## Supplementary Materials:

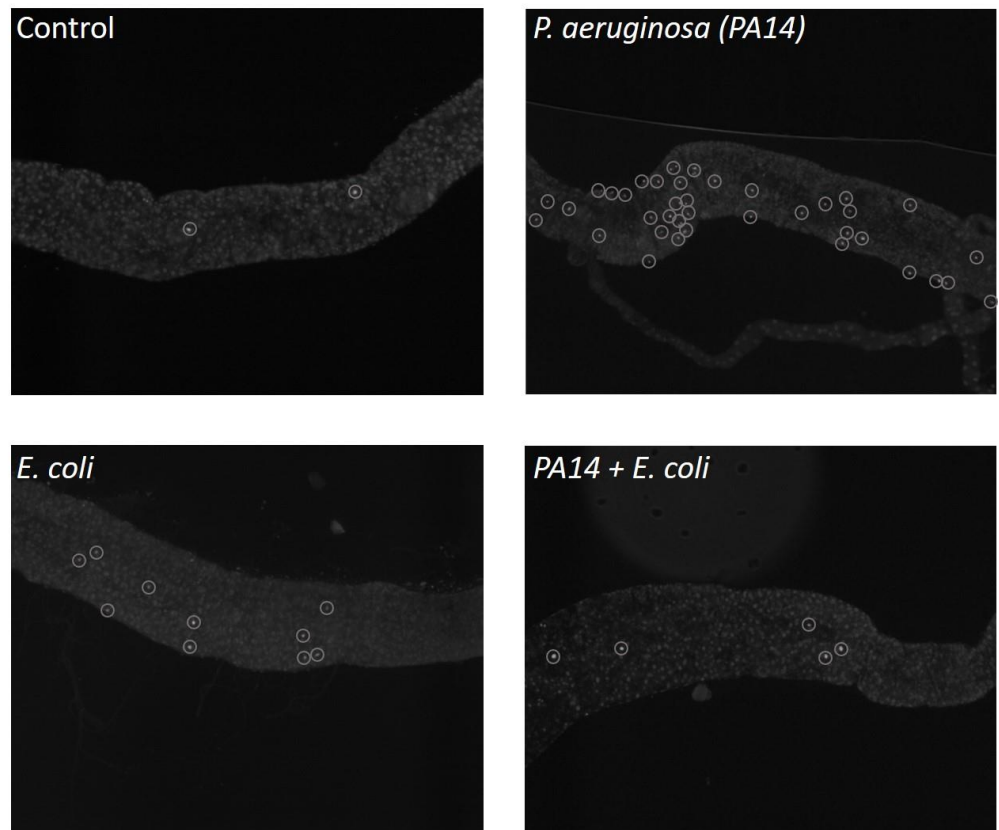

**Supplementary Figure S1.** *P. aeruginosa* (PA14) and *E. coli* (MGH) display antagonistic interactions in the fly midgut, leading to a reduction in the numbers of intestinal mitosis. Confocal images of mitotic cells in the fly midgut, immunostained using anti-pH3 antibody, 48h-post infection with either *P. aeruginosa* (PA14) only or *E. coli* (MGH) only or *P. aeruginosa* + *E. coli*, at 20X magnification. Grey outlines encircle all pH3<sup>+</sup> cells.

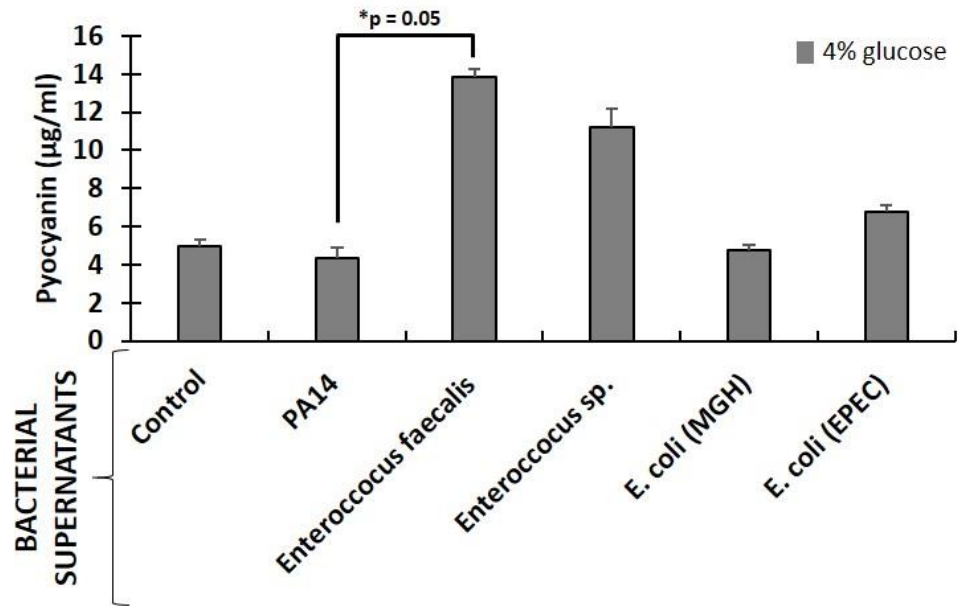

**Supplementary Figure S2.** Secreted factors from *Enterococcus faecalis* and *Enterococcus sp.*, tentatively increase pyocyanin production by *P. aeruginosa* (PA14) in culture, in the presence of glucose. PA14-produced pyocyanin concentration in cultures of *P. aeruginosa* (PA14) in the presence of 4% glucose at 24 hours of PA14 alone (control) or in the presence of bacterial supernatants derived from cultures of either PA14, *Enterococcus faecalis*, *Enterococcus sp.*, *E. coli* (MGH), *E. coli* (EPEC). Error bars represent standard deviation of the mean. Statistical analysis was performed using the one-way ANOVA test and Dunn's multiple comparisons test. Statistical significance indicated as \* $p=0.05$ .
